# Supplementary material
Source: publisher figshare collection journal article supplement (https://springernature.figshare.com/ndownloader/files/18198572)

**Number of admissions per year variation according to season (A), gender (B) and age class (C)**

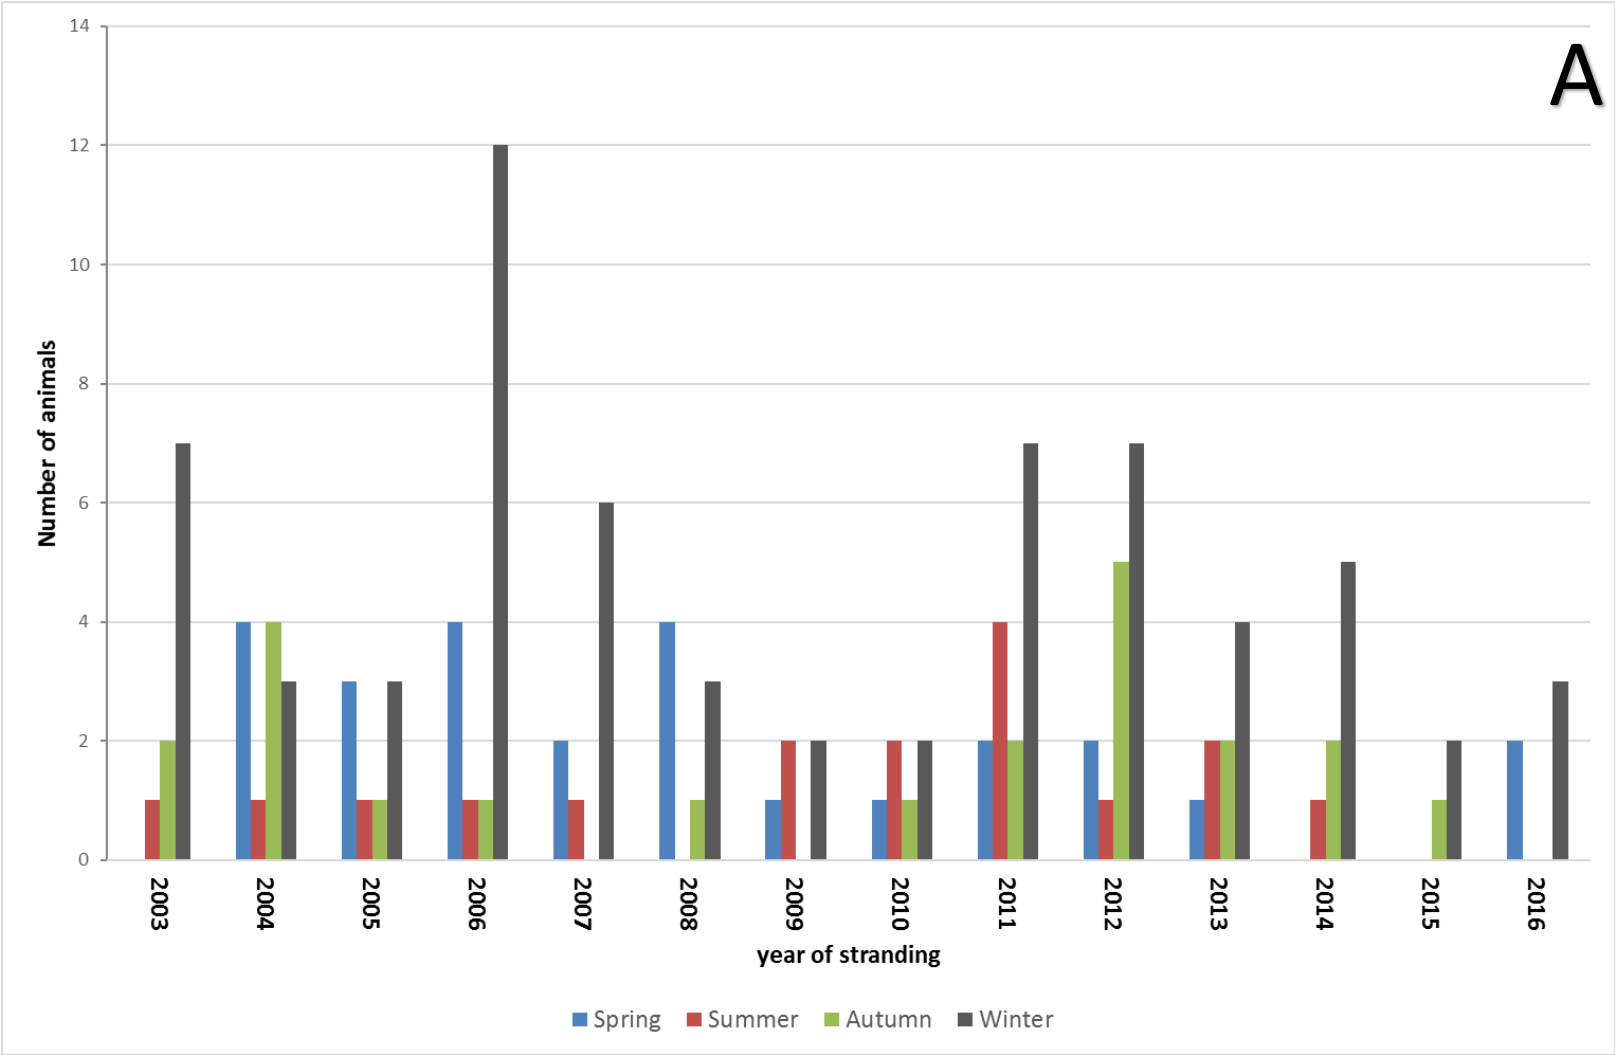

**B**

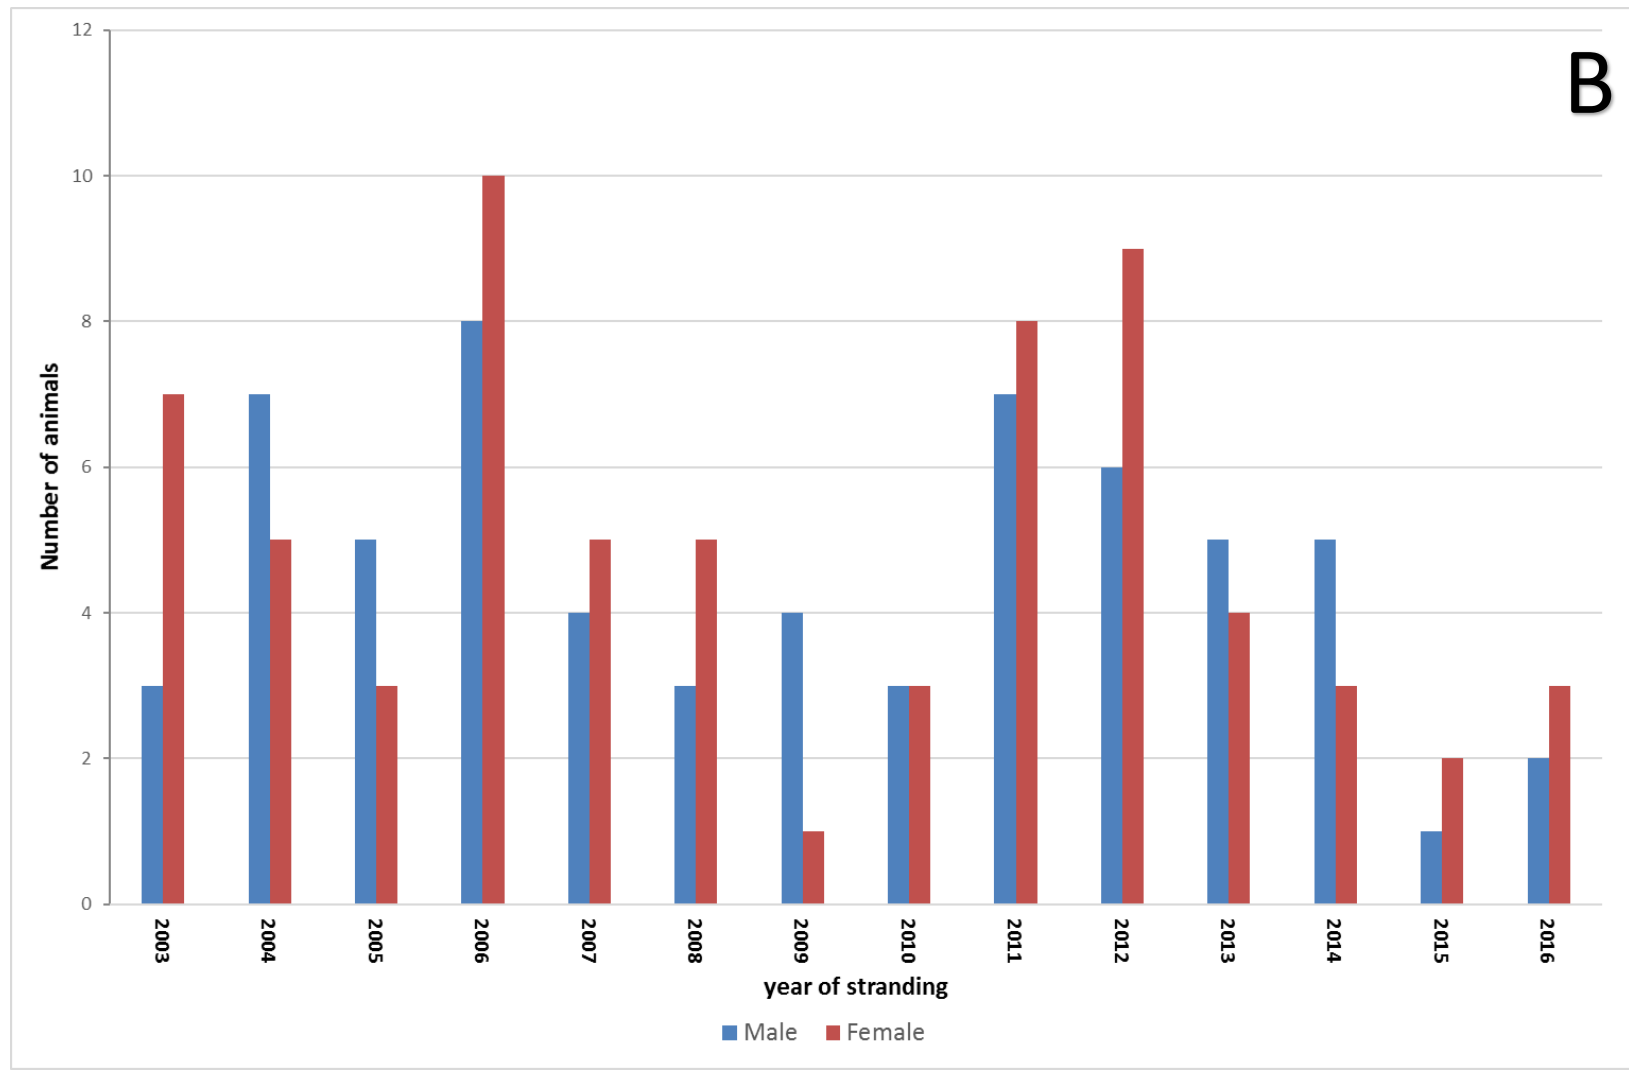

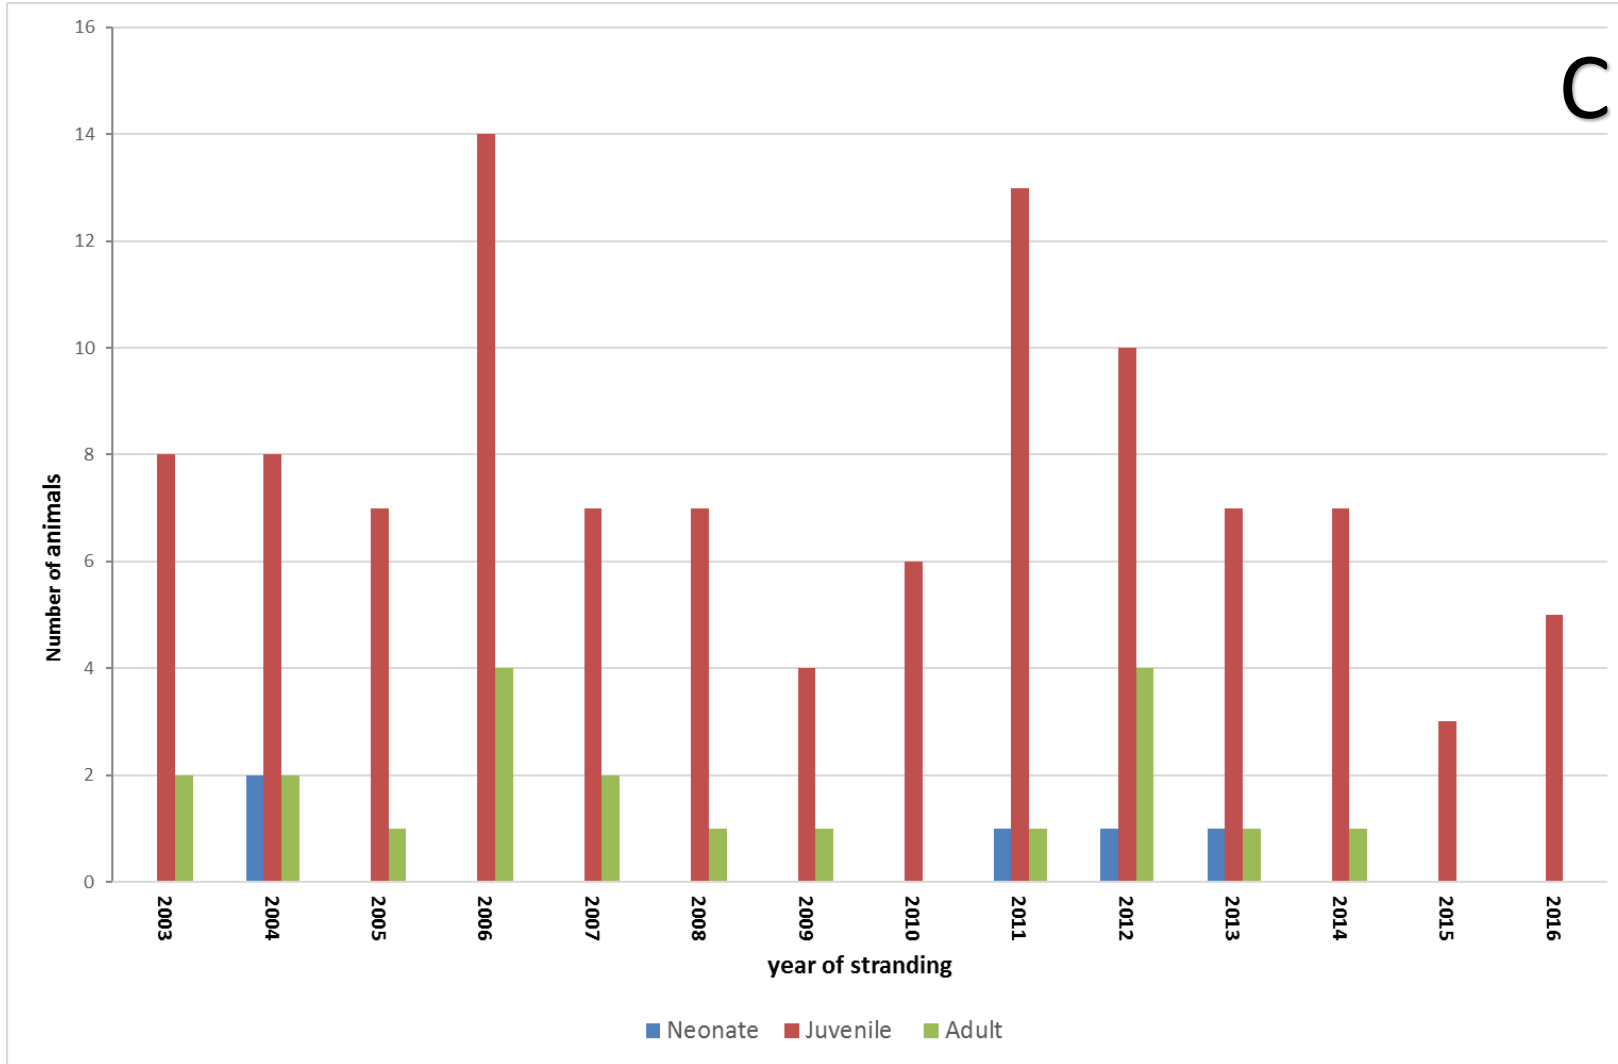

Supplement: Supplementary file [file 18198572]
